# Supplementary material for: X-linked SBMA model mice display relevant non-neurological phenotypes and their expression of mutant androgen receptor protein in motor neurons is not required for neuromuscular disease
Source: PubMed Central journal article supplement (PMC10239133; doi:10.1186/s40478-023-01582-1), 2023-06-02

**A**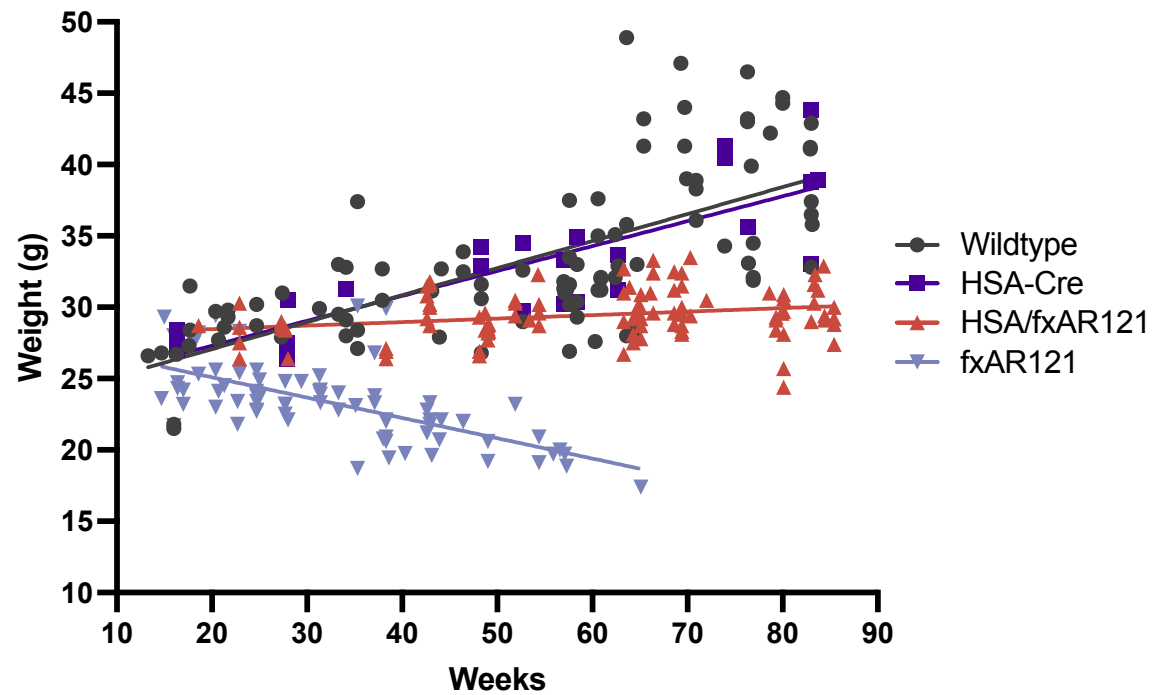**B**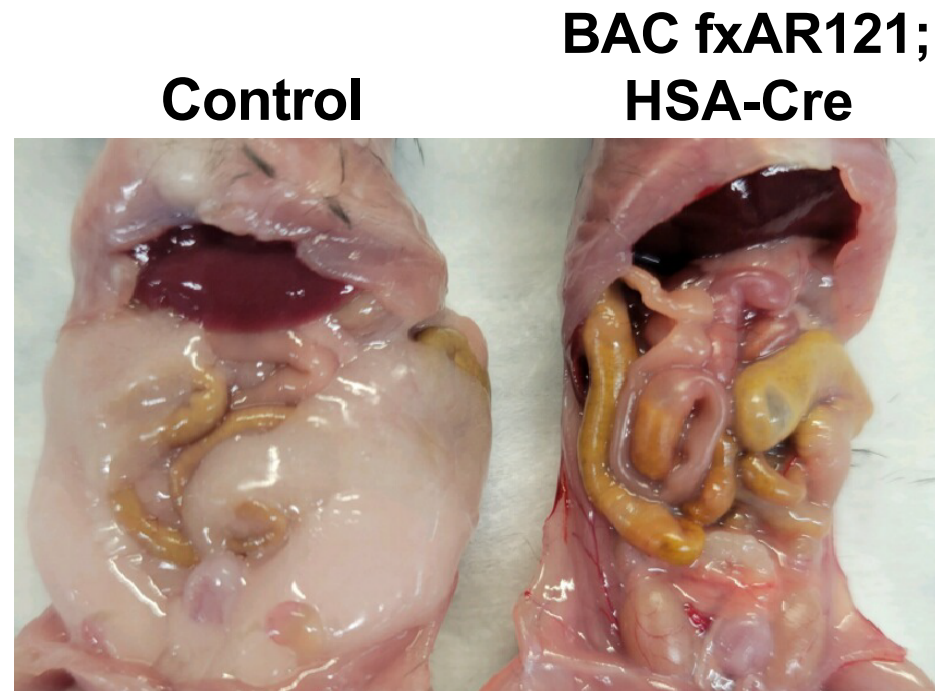

Supplement: 40478_2023_1582_MOESM1_ESM.pdf [file 40478_2023_1582_MOESM1_ESM.pdf]
